# Supplementary material for: Controllable synergistic effect of Yb3+, Er3+co-doped KLu2F7with the assistant of defect state
Source: Royal Society of Chemistry journal article supplement (doi:10.1039/c6ce00098c), 2016-01-01
Supplement: c6ce00098c1.pdf [file c6ce00098c1.pdf]

## **Controllable synergistic effect of Yb<sup>3+</sup>, Er<sup>3+</sup> co-doped KLu<sub>2</sub>F<sub>7</sub> with the assistant of defect state**

Wenjuan Bian<sup>a</sup>, Yushuang Qi<sup>a</sup>, Wei Lu<sup>c</sup>, Xue Yu<sup>a,b\*</sup>, Xuhui Xu<sup>a,b\*</sup> and Jianbei Qiu<sup>a,b</sup>

*a. College of Materials Science and Engineering, Kunming University of Science and Technology, Kunming 650093,*

*China*

*b. Key Laboratory of Advanced Materials of Yunnan Province, Kunming 650093, China*

*c. Department of Applied Physics and University Research Facility in Materials Characterization and Device*

*Fabrication, The Hong Kong Polytechnic University, Hong Kong, 999077, China*

\* Corresponding author: Xue Yu ([yuyu6593@126.com](mailto:yuyu6593@126.com)), Xuhui Xu ([xuxuh07@126.com](mailto:xuxuh07@126.com))

*Tel: 86-0871-65188856. Fax: 86-0871-65188856*

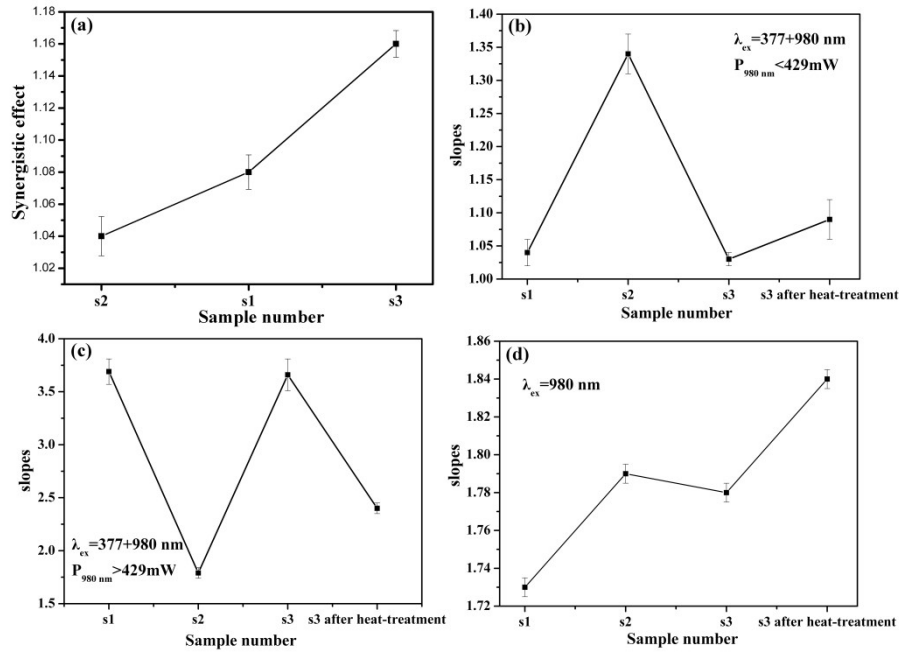

Fig. S1 A scale of error bar of synergistic effect of samples s1, s2 and s3 (a), UC photons under dual-excitation of 377 and 980 nm ( $P_{980 \text{ nm}} < 429 \text{ mW}$ ) (b),  $P_{980 \text{ nm}} > 429 \text{ mW}$  (c) and under single excitation of 980 nm with samples s1, s2, s3 and s3 after heat-treatment.

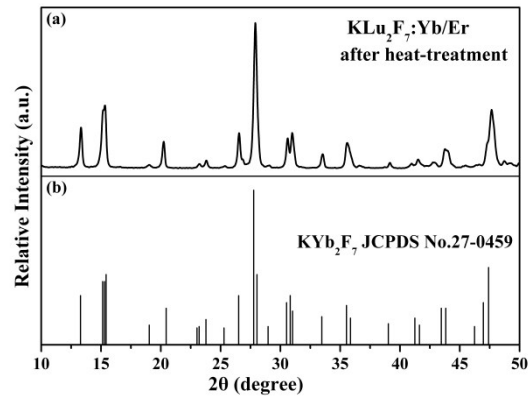

Fig. S2 XRD patterns of sample s3 after heat-treatment (a) and the standard card of  $\text{KYb}_2\text{F}_7$  (b).
